# Supplementary material
Source: PubMed Central journal article supplement (PMC5838594)
Supplement: jamasurg-153-160-s001.pdf [file jamasurg-153-160-s001.pdf]

## Supplementary Online Content

Seib CD, Rochefort H, Chomsky-Higgins K, et al. Association of patient frailty with increased morbidity after common ambulatory general surgery operations.

*JAMA Surg.* Published online October 11, 2017.

doi:10.1001/jamasurg.2017.4007

**eTable 1.** Frequency of Procedure *Current Procedural Terminology (CPT)* Codes

**eTable 2.** Number and Unadjusted Frequency of 30-Day Complications by NSQIP mFI Category in Patients After Ambulatory and 23-Hour-Stay Hernia, Breast, Thyroid, or Parathyroid Surgery in the 2007-2010 ACS NSQIP PUF

This supplementary material has been provided by the authors to give readers additional information about their work.

**eTable 1.** Frequency of Procedure *Current Procedural Terminology (CPT)* Codes

| <b>CPT Code</b>  | <b>Description</b>                                                                                                                                        | <b>n (%)</b>  |
|------------------|-----------------------------------------------------------------------------------------------------------------------------------------------------------|---------------|
| <b>Hernia</b>    |                                                                                                                                                           |               |
| 49505            | Repair initial inguinal hernia, age 5 years or older; reducible                                                                                           | 25,261 (17.9) |
| 49507            | Repair initial inguinal hernia, age 5 years or older; incarcerated or strangulated                                                                        | 1,438 (1.0)   |
| 49520            | Repair recurrent inguinal hernia, any age; reducible                                                                                                      | 2,638 (1.9)   |
| 49521            | Repair recurrent inguinal hernia, any age; incarcerated or strangulated                                                                                   | 357 (0.3)     |
| 49525            | Repair inguinal hernia, sliding, any age                                                                                                                  | 650 (0.5)     |
| 49550            | Repair initial femoral hernia, any age; reducible                                                                                                         | 497 (0.4)     |
| 49553            | Repair initial femoral hernia, any age; incarcerated or strangulated                                                                                      | 306 (0.2)     |
| 49555            | Repair recurrent femoral hernia; reducible                                                                                                                | 49 (<0.1)     |
| 49557            | Repair recurrent femoral hernia; incarcerated or strangulated                                                                                             | 31 (<0.1)     |
| 49560            | Repair initial incisional or ventral hernia; reducible                                                                                                    | 8,152 (5.8)   |
| 49561            | Repair initial incisional or ventral hernia; incarcerated or strangulated                                                                                 | 2,205 (1.6)   |
| 49565            | Repair recurrent incisional or ventral hernia; reducible                                                                                                  | 1,545 (1.1)   |
| 49566            | Repair recurrent incisional or ventral hernia; incarcerated or strangulated                                                                               | 453 (0.3)     |
| 49585            | Repair umbilical hernia, age 5 years or older; reducible                                                                                                  | 11,512 (8.2)  |
| 49587            | Repair umbilical hernia, age 5 years or older; incarcerated or strangulated                                                                               | 4,146 (2.9)   |
| 49650            | Laparoscopy, surgical; repair initial inguinal hernia                                                                                                     | 7,521 (5.3)   |
| 49651            | Laparoscopy, surgical; repair recurrent inguinal hernia                                                                                                   | 1,187 (0.8)   |
| 49652            | Laparoscopy, surgical, repair, ventral, umbilical, spigelian or epigastric hernia                                                                         | 1,382 (1.0)   |
| 49653            | Laparoscopy, surgical, repair, ventral, umbilical, spigelian or epigastric hernia (includes mesh insertion, when performed); incarcerated or strangulated | 498 (0.4)     |
| 49654            | Laparoscopy, surgical, repair, incisional hernia (includes mesh insertion, when performed); reducible                                                     | 965 (0.7)     |
| 49655            | Laparoscopy, surgical, repair, incisional hernia (includes mesh insertion, when performed); incarcerated or strangulated                                  | 272 (0.2)     |
| 49656            | Laparoscopy, surgical, repair, recurrent incisional hernia (includes mesh insertion, when performed); reducible                                           | 280 (0.2)     |
| 49657            | Laparoscopy, surgical, repair, recurrent incisional hernia (includes mesh insertion, when performed); incarcerated or strangulated                        | 110 (<0.1)    |
| <b>Endocrine</b> |                                                                                                                                                           |               |
| 60210            | Partial thyroid lobectomy, unilateral; with or without isthmusectomy                                                                                      | 571 (0.4)     |
| 60212            | Partial thyroid lobectomy, unilateral; with contralateral subtotal lobectomy, including isthmusectomy                                                     | 95 (<0.1)     |
| 60220            | Total thyroid lobectomy, unilateral; with or without isthmusectomy                                                                                        | 3,806 (2.7)   |
| 60225            | Total thyroid lobectomy, unilateral; with contralateral subtotal lobectomy, including isthmusectomy                                                       | 333 (0.2)     |
| 60240            | Thyroidectomy, total or complete                                                                                                                          | 4,451 (3.2)   |
| 60252            | Thyroidectomy, total or subtotal for malignancy; with limited neck dissection                                                                             | 568 (0.4)     |
| 60254            | Thyroidectomy, total or subtotal for malignancy; with radical neck dissection                                                                             | 58 (<0.1)     |

|               |                                                                                                                                      |               |
|---------------|--------------------------------------------------------------------------------------------------------------------------------------|---------------|
| 60260         | Thyroidectomy, removal of all remaining thyroid tissue following previous removal of a portion of thyroid                            | 364 (0.3)     |
| 60271         | Thyroidectomy, including substernal thyroid; cervical approach                                                                       | 224 (0.2)     |
| 60500         | Parathyroidectomy or exploration of parathyroid(s)                                                                                   | 7,147 (5.1)   |
| 60502         | Parathyroidectomy or exploration of parathyroid(s); re-exploration                                                                   | 242 (0.2)     |
| 38720         | Cervical lymphadenectomy (complete)                                                                                                  | 51 (<0.1)     |
| 38724         | Cervical lymphadenectomy (modified radical neck dissection)                                                                          | 196 (0.1)     |
| <b>Breast</b> |                                                                                                                                      |               |
| 19120         | Excision of cyst, fibroadenoma, or other benign or malignant tumor, aberrant breast tissue, open                                     | 8,781 (6.2)   |
| 19125         | Excision of breast lesion identified by preoperative placement of radiological marker, open                                          | 13,975 (9.9)  |
| 19300         | Mastectomy for gynecomastia                                                                                                          | 292 (0.2)     |
| 19301         | Mastectomy, partial (eg, lumpectomy, tylectomy, quadrantectomy, segmentectomy)                                                       | 14,347 (10.2) |
| 19302         | Mastectomy, partial (eg, lumpectomy, tylectomy, quadrantectomy, segmentectomy); with axillary lymphadenectomy                        | 3,509 (2.5)   |
| 19303         | Mastectomy, simple, complete                                                                                                         | 4,667 (3.3)   |
| 19304         | Mastectomy, subcutaneous                                                                                                             | 238 (0.2)     |
| 19305         | Mastectomy, radical, including pectoral muscles, axillary lymph nodes                                                                | 161 (0.1)     |
| 19306         | Mastectomy, radical, including pectoral muscles, axillary and internal mammary lymph nodes                                           | 38 (<0.1)     |
| 19307         | Mastectomy, modified radical, including axillary lymph nodes, with or without pectoralis minor but excluding pectoralis major muscle | 2,919 (2.1)   |
| 19316         | Mastopexy                                                                                                                            | 321 (0.2)     |
| 19318         | Reduction mammoplasty                                                                                                                | 937 (0.7)     |
| 19324         | Mammoplasty, augmentation; without prosthetic implant                                                                                | 17 (<0.1)     |
| 19325         | Mammoplasty, augmentation; with prosthetic implant                                                                                   | 241 (0.2)     |
| 19328         | Removal of intact mammary implant                                                                                                    | 101 (<0.1)    |
| 19330         | Removal of mammary implant material                                                                                                  | 47 (<0.1)     |
| 19340         | Immediate insertion of breast prosthesis following mastopexy, mastectomy, or in reconstruction                                       | 110 (<0.1)    |
| 19342         | Delayed insertion of breast prosthesis following mastopexy, mastectomy or in reconstruction                                          | 299 (0.2)     |
| 19357         | Breast reconstruction, immediate or delayed, with tissue expander, including subsequent expansion                                    | 267 (0.2)     |

**eTable 2.** Number and Unadjusted Frequency of 30-Day Complications by NSQIP mFI Category in Patients After Ambulatory and 23-Hour-Stay Hernia, Breast, Thyroid, or Parathyroid Surgery in the 2007-2010 ACS NSQIP PUF

| <b>Complication—no. (%)</b>    | <b>All patients<br/>(n =140,828)</b> | <b>Low NSQIP<br/>mFI<br/>&lt; 0.18<br/>(n = 118,831)</b> | <b>Intermediate<br/>NSQIP mFI<br/>0.18 – 0.35<br/>(n = 21,036 )</b> | <b>High NSQIP<br/>mFI<br/>&gt; = 0.36<br/>(n = 961)</b> | <b><i>P</i><br/>value</b> |
|--------------------------------|--------------------------------------|----------------------------------------------------------|---------------------------------------------------------------------|---------------------------------------------------------|---------------------------|
| Pulmonary                      | 166 (0.12)                           | 100 (0.08)                                               | 55 (0.3)                                                            | 11 (1.1)                                                | <b>&lt;.001</b>           |
| Cardiac                        | 51 (0.04)                            | 29 (0.02)                                                | 21 (0.1)                                                            | 1 (0.1)                                                 | <b>&lt;.001</b>           |
| Neurologic                     | 53 (0.04)                            | 30 (0.03)                                                | 19 (0.1)                                                            | 4 (0.4)                                                 | <b>&lt;.001</b>           |
| Renal                          | 41 (0.03)                            | 19 (0.02)                                                | 19 (0.1)                                                            | 3 (0.3)                                                 | <b>&lt;.001</b>           |
| Bleeding                       | 13 (0.01)                            | 6 (0.01)                                                 | 6 (0.03)                                                            | 1 (0.1)                                                 | <b>.004</b>               |
| Sepsis                         | 175 (0.12)                           | 115 (0.1)                                                | 48 (0.2)                                                            | 12 (1.3)                                                | <b>&lt;.001</b>           |
| Surgical site infection        |                                      |                                                          |                                                                     |                                                         |                           |
| Superficial                    | 1,227 (0.87)                         | 959 (0.81)                                               | 246 (1.2)                                                           | 22 (2.3)                                                | <b>&lt;.001</b>           |
| Deep incisional or organ space | 367 (0.26)                           | 280 (0.24)                                               | 81 (0.4)                                                            | 6 (0.6)                                                 | <b>&lt;.001</b>           |
| Wound dehiscence               | 142 (0.1)                            | 97 (0.08)                                                | 44 (0.2)                                                            | 1 (0.1)                                                 | <b>&lt;.001</b>           |
| Urinary tract infection        | 362 (0.26)                           | 256 (0.22)                                               | 92 (0.44)                                                           | 14 (1.5)                                                | <b>&lt;.001</b>           |
| Venous thromboembolism         | 142 (0.1)                            | 111 (0.09)                                               | 30 (0.14)                                                           | 1 (0.1)                                                 | 0.14                      |
